# Supplementary material for: Synthesis and the physical properties of layered copper oxytellurides Sr2TMCu2Te2O2 (TM = Mn, Co, Zn)
Source: Royal Society of Chemistry journal article supplement (doi:10.1039/c8tc04506b), 2018-01-01
Supplement: c8tc04506b1.pdf [file c8tc04506b1.pdf]

## Supplementary Information

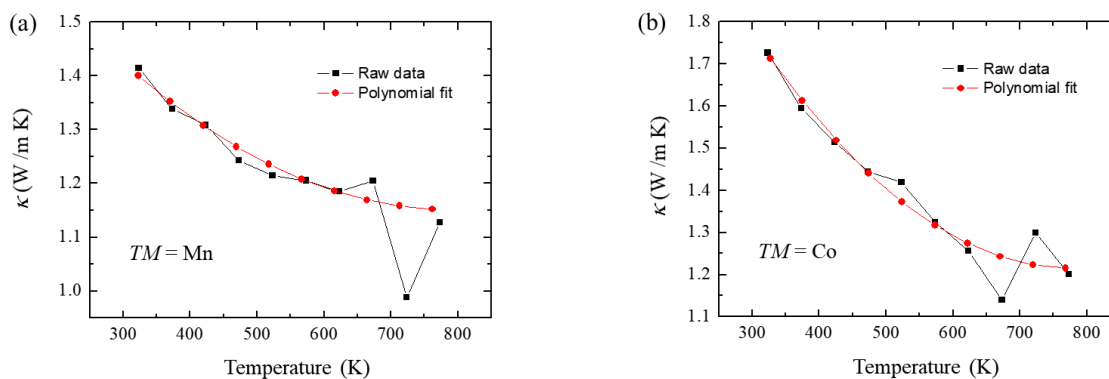

Fig. S1 (a), (b) Thermal conductivity of  $\text{Sr}_2\text{MnCu}_2\text{Te}_2\text{O}_2$  and  $\text{Sr}_2\text{CoCu}_2\text{Te}_2\text{O}_2$ , respectively. Black square and red circle corresponds to the raw data and its polynomial fit result, respectively.

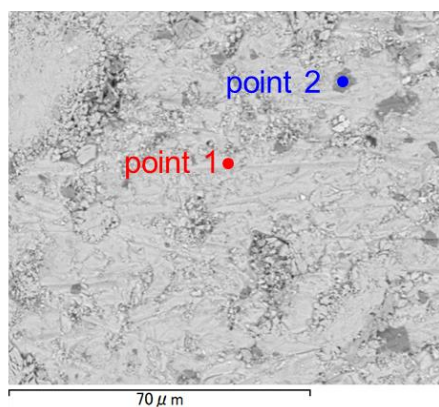

point 1

| Element   | Atomic % | ratio |
|-----------|----------|-------|
| Oxygen    | 36.56%   | 3.95  |
| Cobalt    | 9.26%    | 1.00  |
| Copper    | 18.07%   | 1.95  |
| Strontium | 17.95%   | 1.94  |
| Tellurium | 18.16%   | 1.96  |

point 2

| Element   | Atomic % | ratio |
|-----------|----------|-------|
| Oxygen    | 76.74%   | -     |
| Cobalt    | 0.21%    | -     |
| Copper    | 0.28%    | -     |
| Strontium | 21.39%   | -     |
| Tellurium | 1.39%    | -     |

Fig. S2 SEM image and measured compositions by EDX for  $\text{Sr}_2\text{CoCu}_2\text{Te}_2\text{O}_2$
